# Supplementary material for: Corneal confocal microscopy identifies corneal nerve fibre loss and increased dendritic cells in patients with long COVID
Source: HighWire-hosted journal article supplement (doi:10.1136/bjophthalmol-2021-319450), 2021-07-26
Supplement: bjophthalmol-2021-319450supp001_data_supplement.pdf [file bjophthalmol-2021-319450supp001_data_supplement.pdf]

## National Institute for Health and Care Excellence (NICE) Long-COVID Questionnaire

| Do you still have any of the following symptoms? | Before COVID infection   | 4 weeks after infection  | 12 weeks after infection |
|--------------------------------------------------|--------------------------|--------------------------|--------------------------|
| <b>Generalized</b>                               |                          |                          |                          |
| Fever                                            | <input type="checkbox"/> | <input type="checkbox"/> | <input type="checkbox"/> |
| Fatigue                                          | <input type="checkbox"/> | <input type="checkbox"/> | <input type="checkbox"/> |
| Pain                                             | <input type="checkbox"/> | <input type="checkbox"/> | <input type="checkbox"/> |
| <b>Respiratory</b>                               |                          |                          |                          |
| Cough                                            | <input type="checkbox"/> | <input type="checkbox"/> | <input type="checkbox"/> |
| Breathlessness                                   | <input type="checkbox"/> | <input type="checkbox"/> | <input type="checkbox"/> |
| <b>Cardiovascular</b>                            |                          |                          |                          |
| Chest tightness                                  | <input type="checkbox"/> | <input type="checkbox"/> | <input type="checkbox"/> |
| Chest pain                                       | <input type="checkbox"/> | <input type="checkbox"/> | <input type="checkbox"/> |
| Palpitations                                     | <input type="checkbox"/> | <input type="checkbox"/> | <input type="checkbox"/> |
| <b>Neurological</b>                              |                          |                          |                          |
| Brain fog, memory/ concentration loss            | <input type="checkbox"/> | <input type="checkbox"/> | <input type="checkbox"/> |
| Headache                                         | <input type="checkbox"/> | <input type="checkbox"/> | <input type="checkbox"/> |
| Sleep disturbance                                | <input type="checkbox"/> | <input type="checkbox"/> | <input type="checkbox"/> |
| Delirium (older patients)                        | <input type="checkbox"/> | <input type="checkbox"/> | <input type="checkbox"/> |
| Dizziness                                        | <input type="checkbox"/> | <input type="checkbox"/> | <input type="checkbox"/> |
| Loss or change to your sense of taste/smell      | <input type="checkbox"/> | <input type="checkbox"/> | <input type="checkbox"/> |
| Pins and needles/numbness                        | <input type="checkbox"/> | <input type="checkbox"/> | <input type="checkbox"/> |
| <b>Musculoskeletal</b>                           |                          |                          |                          |
| Joint pain                                       | <input type="checkbox"/> | <input type="checkbox"/> | <input type="checkbox"/> |
| Muscle pain                                      | <input type="checkbox"/> | <input type="checkbox"/> | <input type="checkbox"/> |
| <b>Psychological/psychiatric</b>                 |                          |                          |                          |
| Symptoms of depression                           | <input type="checkbox"/> | <input type="checkbox"/> | <input type="checkbox"/> |
| Symptoms of anxiety                              | <input type="checkbox"/> | <input type="checkbox"/> | <input type="checkbox"/> |
| <b>Gastrointestinal</b>                          |                          |                          |                          |
| Abdominal pain                                   | <input type="checkbox"/> | <input type="checkbox"/> | <input type="checkbox"/> |
| Nausea                                           | <input type="checkbox"/> | <input type="checkbox"/> | <input type="checkbox"/> |
| Diarrhea                                         | <input type="checkbox"/> | <input type="checkbox"/> | <input type="checkbox"/> |
| Anorexia/ loss of appetite                       | <input type="checkbox"/> | <input type="checkbox"/> | <input type="checkbox"/> |
| Digestive disorders                              | <input type="checkbox"/> | <input type="checkbox"/> | <input type="checkbox"/> |
| <b>Ear, nose and throat</b>                      |                          |                          |                          |
| Tinnitus                                         | <input type="checkbox"/> | <input type="checkbox"/> | <input type="checkbox"/> |
| Earache                                          | <input type="checkbox"/> | <input type="checkbox"/> | <input type="checkbox"/> |
| Sore throat                                      | <input type="checkbox"/> | <input type="checkbox"/> | <input type="checkbox"/> |
| <b>Dermatological</b>                            |                          |                          |                          |
| Skin rash                                        | <input type="checkbox"/> | <input type="checkbox"/> | <input type="checkbox"/> |
